# Supplementary material for: Use of Smartphone Cameras and Other Applications While Traveling to Sustain Outdoor Cultural Heritage
Source: MDPI journal article supplement (doi:10.3390/su13137312), 2021-06-30
Supplement: s1 [file s1]

## Questionnaire for focus group participants (English translation)

Dear Sir or Madam,

At the InnoRenew Center of Excellence, we are conducting research on the use of mobile phone applications on excursions and trips, and on the interest in visiting cultural heritage monuments. The research is carried out within the project Protection of Bronze Monuments in a Changing Environment, managed by the Institute for the Protection of Cultural Heritage and financed by the Public Agency for Research of the Republic of Slovenia. The results of the research will help us understand the use of this technology and create mechanisms for involving the public in the protection of cultural heritage and develop a game designed to encourage the interaction of visitors with cultural heritage. We will classify users of various applications into four focus groups, within which we will have group conversations that will last about an hour and a half.

We invite you to fill in a screening questionnaire, on the basis of which we will assess whether you meet the conditions for inclusion and invite you to participate in a group discussion. All participants in the conversation will receive a practical gift in return for participating.

For more information about the project, please contact [surveys@innorenew.eu](mailto:surveys@innorenew.eu).

Best regards,  
Ana Slavec  
InnoRenew CoE

Q1 - Where did you find the invitations to participate in the research?

Several answers are possible

On the FB page / group on the topic of the location game Geocaching

On the FB page / group on the topic of the location game Pokemon Go

On the FB page / group on the topic of trips / excursions / cities

On the FB page / group of the university / research institution

I received the invitation via e-mail

Other:

Q2 - What mobile phone do you use (for private purposes)?

Smartphone

Mobile phone with basic functions

I don't use a cell phone

Q3 - Do you work as a tour guide?

Yes

No

Q4 - Do you work in the field of market research?

Yes

No

(1) Q2 = [1] and Q3 = [2] and Q4 = [2]

Q5 - Have you used any of the listed types of apps on your smartphone this year?

Several answers are possible

Camera

Location games (e.g. Geocaching, Pokemon Go ...)

Travel apps (e.g. CultureTrip, TripAdvisor ...)

Social networks (e.g. Facebook, Instagram, Twitter ...)

Maps (e.g. Google Maps, Apple maps ....)

None of the above

No applications

(1) Q2 = [1] and Q3 = [2] and Q4 = [2]

Q6 - Please think about short trips (without overnight stays) on which you have visited a place. How many such trips did you make in 2019 in Slovenia and how many abroad?

0 excursions      1 excursion      2-5 excursions      6-9 excursions      More than 10 excursions

In Slovenia

Abroad

IF (1) Q2 = [1] and Q3 = [2] and Q4 = [2]

Q7 - Please think about trips (with at least one overnight stay) on which you have visited a city. How many such trips did you make in 2019 in Slovenia and how many abroad?

0 trips      1 trip      2-5 trips      6-9 trips      More than 10 trips

In Slovenia

Abroad

(1) Q2 = [1] and Q3 = [2] and Q4 = [2]

Q8 - Which applications did you use on trips or travels in 2019?

Several answers are possible

Camera

Location game Geocaching

Location game Pokemon Go

Location game - other:

Travel apps (e.g. CultureTrip, TripAdvisor ...)

Social networks (e.g. Facebook, Instagram, Twitter ...)

Maps (e.g. Google Maps, Apple maps ....)

Other:

Other:

Other:

No applications

(1) Q2 = [1] and Q3 = [2] and Q4 = [2]

Q9 - Gender

Men

Female

IF (1) Q2 = [1] and Q3 = [2] and Q4 = [2]

Q10 - Age

18-24 years

25-34 years

35-44 years

45-54 years

55-64 years

65 or more years

(2) Q5 = [Q5b]

Q11 - Would you be willing to attend a focus group on the use of mobile applications on excursions / trips, which would take place in the afternoon in Ljubljana or Koper?

Several answers are possible

Yes, in Koper

Yes, in Ljubljana

No

IF (4) Q11 = [1]

Q12 - In order to send you an invitation with the exact date and location of the focus group, we need your personal information. We will keep them in accordance with the General Data Protection Regulation (GDPR) and use them only for the purpose of conducting the survey. We will not share them with third parties and we will permanently delete your personal data after the survey has been carried out.

---

IF (4) Q11 = [1]

Q13 - Name and surname

---

IF (4) Q11 = [1]

Q14 - Telephone number

---

IF (4) Q11 = [1]

Q15 - E-mail address

---

IF (7) Q2 = [2, -97] or Q3 = [1] or Q4 = [1] or Q11 = [2]

Q16 - Sorry, you are not eligible to participate in this survey.

---
