# Supplementary material for: Use of Smartphone Cameras and Other Applications While Traveling to Sustain Outdoor Cultural Heritage
Source: MDPI journal article supplement (doi:10.3390/su13137312), 2021-06-30
Supplement: s1 [file s1]

**1. In the screening questionnaire, you all stated that you use a camera. Think about your trips and travels over the past year — how did you use the camera?**

- 1.1. What motifs did you photograph? Why?
- 1.2. Have motifs ever been cultural heritage? Which cultural heritage do you remember the most? Why?
- 1.3. Was there a statue among the motifs you captured? What statues did you photograph? Why?
- 1.4. Are you also interested in the properties of the material from which the statues are made?
- 1.5. Do you notice any defects on the statues, e.g. corrosion on bronze statues? Do you find this an interesting photographic motif?
- 1.6. Are you more attracted to statues if you know their story? Do you remember any?
- 1.7. What do you do with the photos? Who do you send them to? Do you post them online? Why?

**2. Did you ever download a location-specific app to your phone on a trip or excursion, e.g. a city/landmark app?**

- 2.1. How do you decide to download and use an application? What properties would a travel app need for you to download it? Which features of travel applications are most important to you? What bothers you?
- 2.2. Would you download a tourist app in a certain city if it contained a game that would guide you around that city / landmark? Why?
- 2.3. Would you take part in a game where you would be presented with a photograph of a certain part of the statue, and your task would be to take the same or as similar a photo as possible and upload it to the app or post it somewhere online?
- 2.4. What would motivate you to use such a game? Collecting points, reaching levels on a scale, rewards? Would it motivate you if the game told you the story of the statue in return?
- 2.5. Would you be willing to post this photo on a social network? Would you have any reservations about that?

**3. Questions about location games (Pokémon GO, Geocaching ...). In the screening questionnaire you stated ...**

**... that you have not used location games in the last year ....**

- 3.1 Have you heard of the Pokémon GO and Geocaching apps? What about any other location games/apps?
- 3.2 Have you ever tried to play them in the past? Would you be interested in trying out these games? What would have to happen to start playing these games?
- 3.3 Do you play any other games on your mobile phone? What games do you like best?

**... that you have used location games like Pokémon Go and Geocaching in the last year ...**

- 3.4 How long have you been playing games like this? Why did you start? What prompted you to do this?
- 3.5 Why are you still playing? How often and in what way do you play?
- 3.6 How important are ... in this?
  - Achievements,
  - Socializing,
  - Deepening into the content,
  - Discovering space,
  - Pleasure,
  - Nostalgia
- 3.7 Do you also play location games on trips and travels? In what way?
- 3.8 How much are you focused on the game and how much on the surroundings? Have you ever discovered something interesting in the area because of the app?
