# Supplementary figures and images for: Use of Smartphone Cameras and Other Applications While Traveling to Sustain Outdoor Cultural Heritage
Source: MDPI journal article supplement (doi:10.3390/su13137312), 2021-06-30

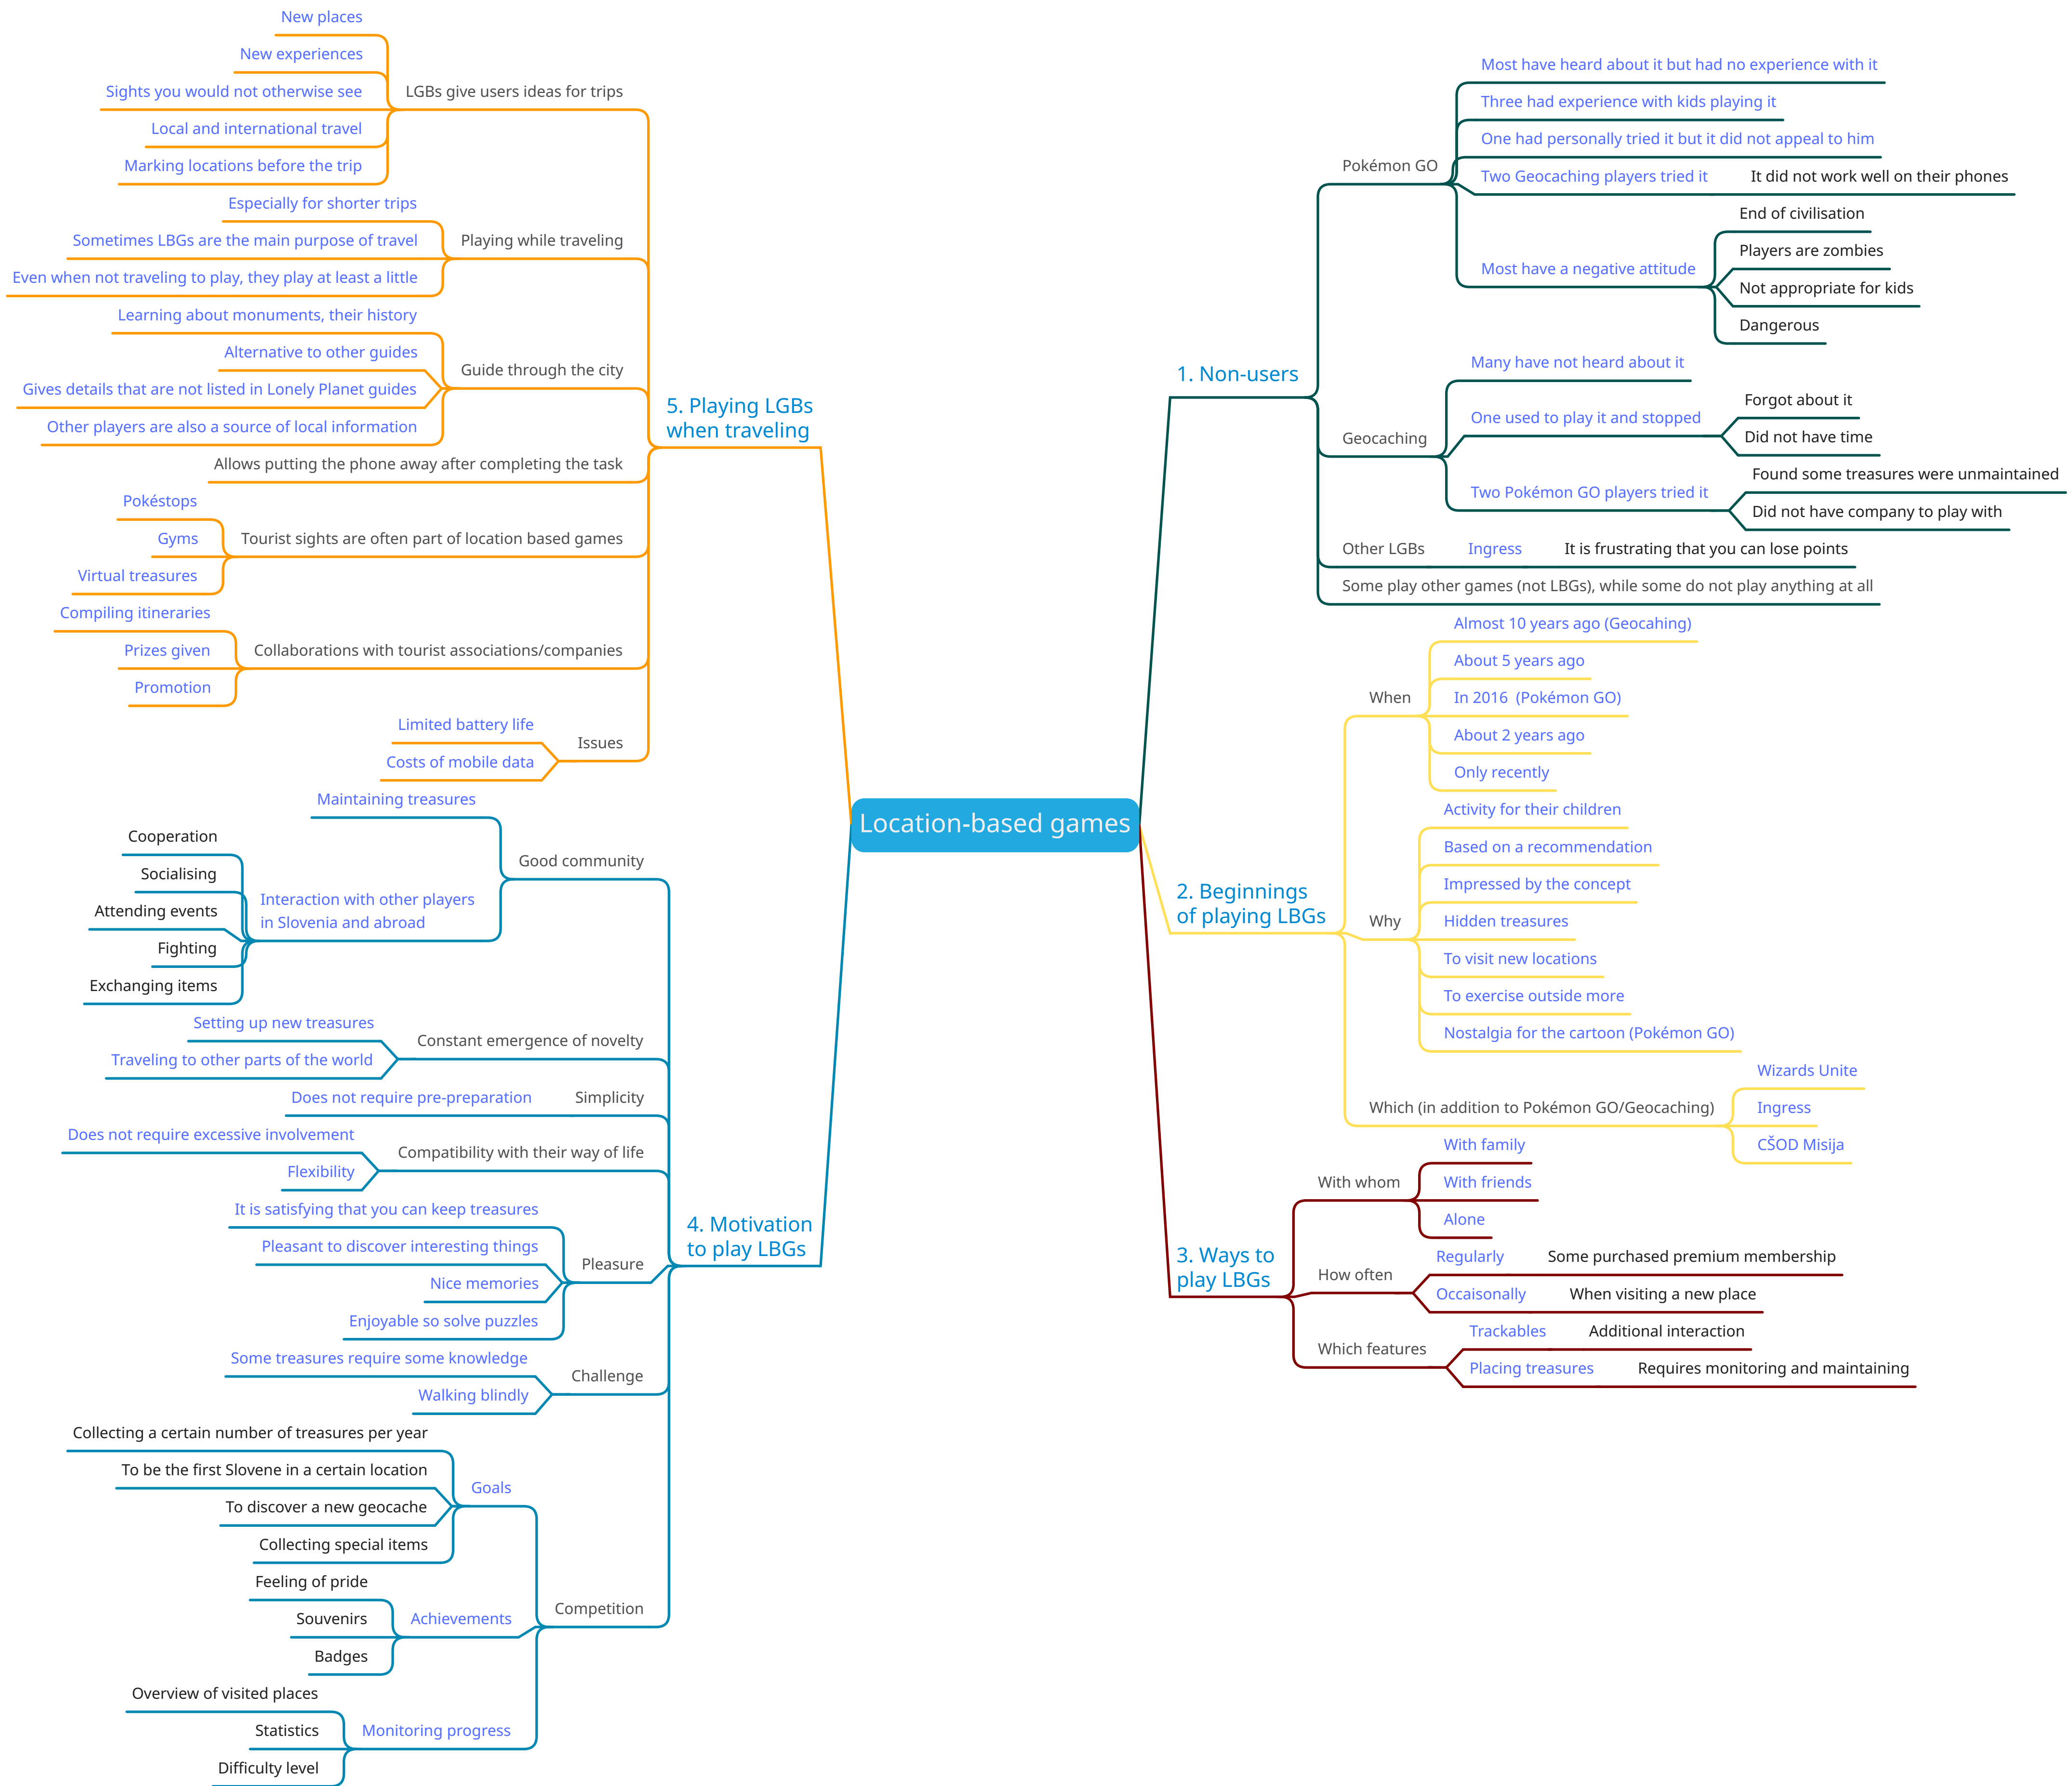

Supplement: s1 [file s1]

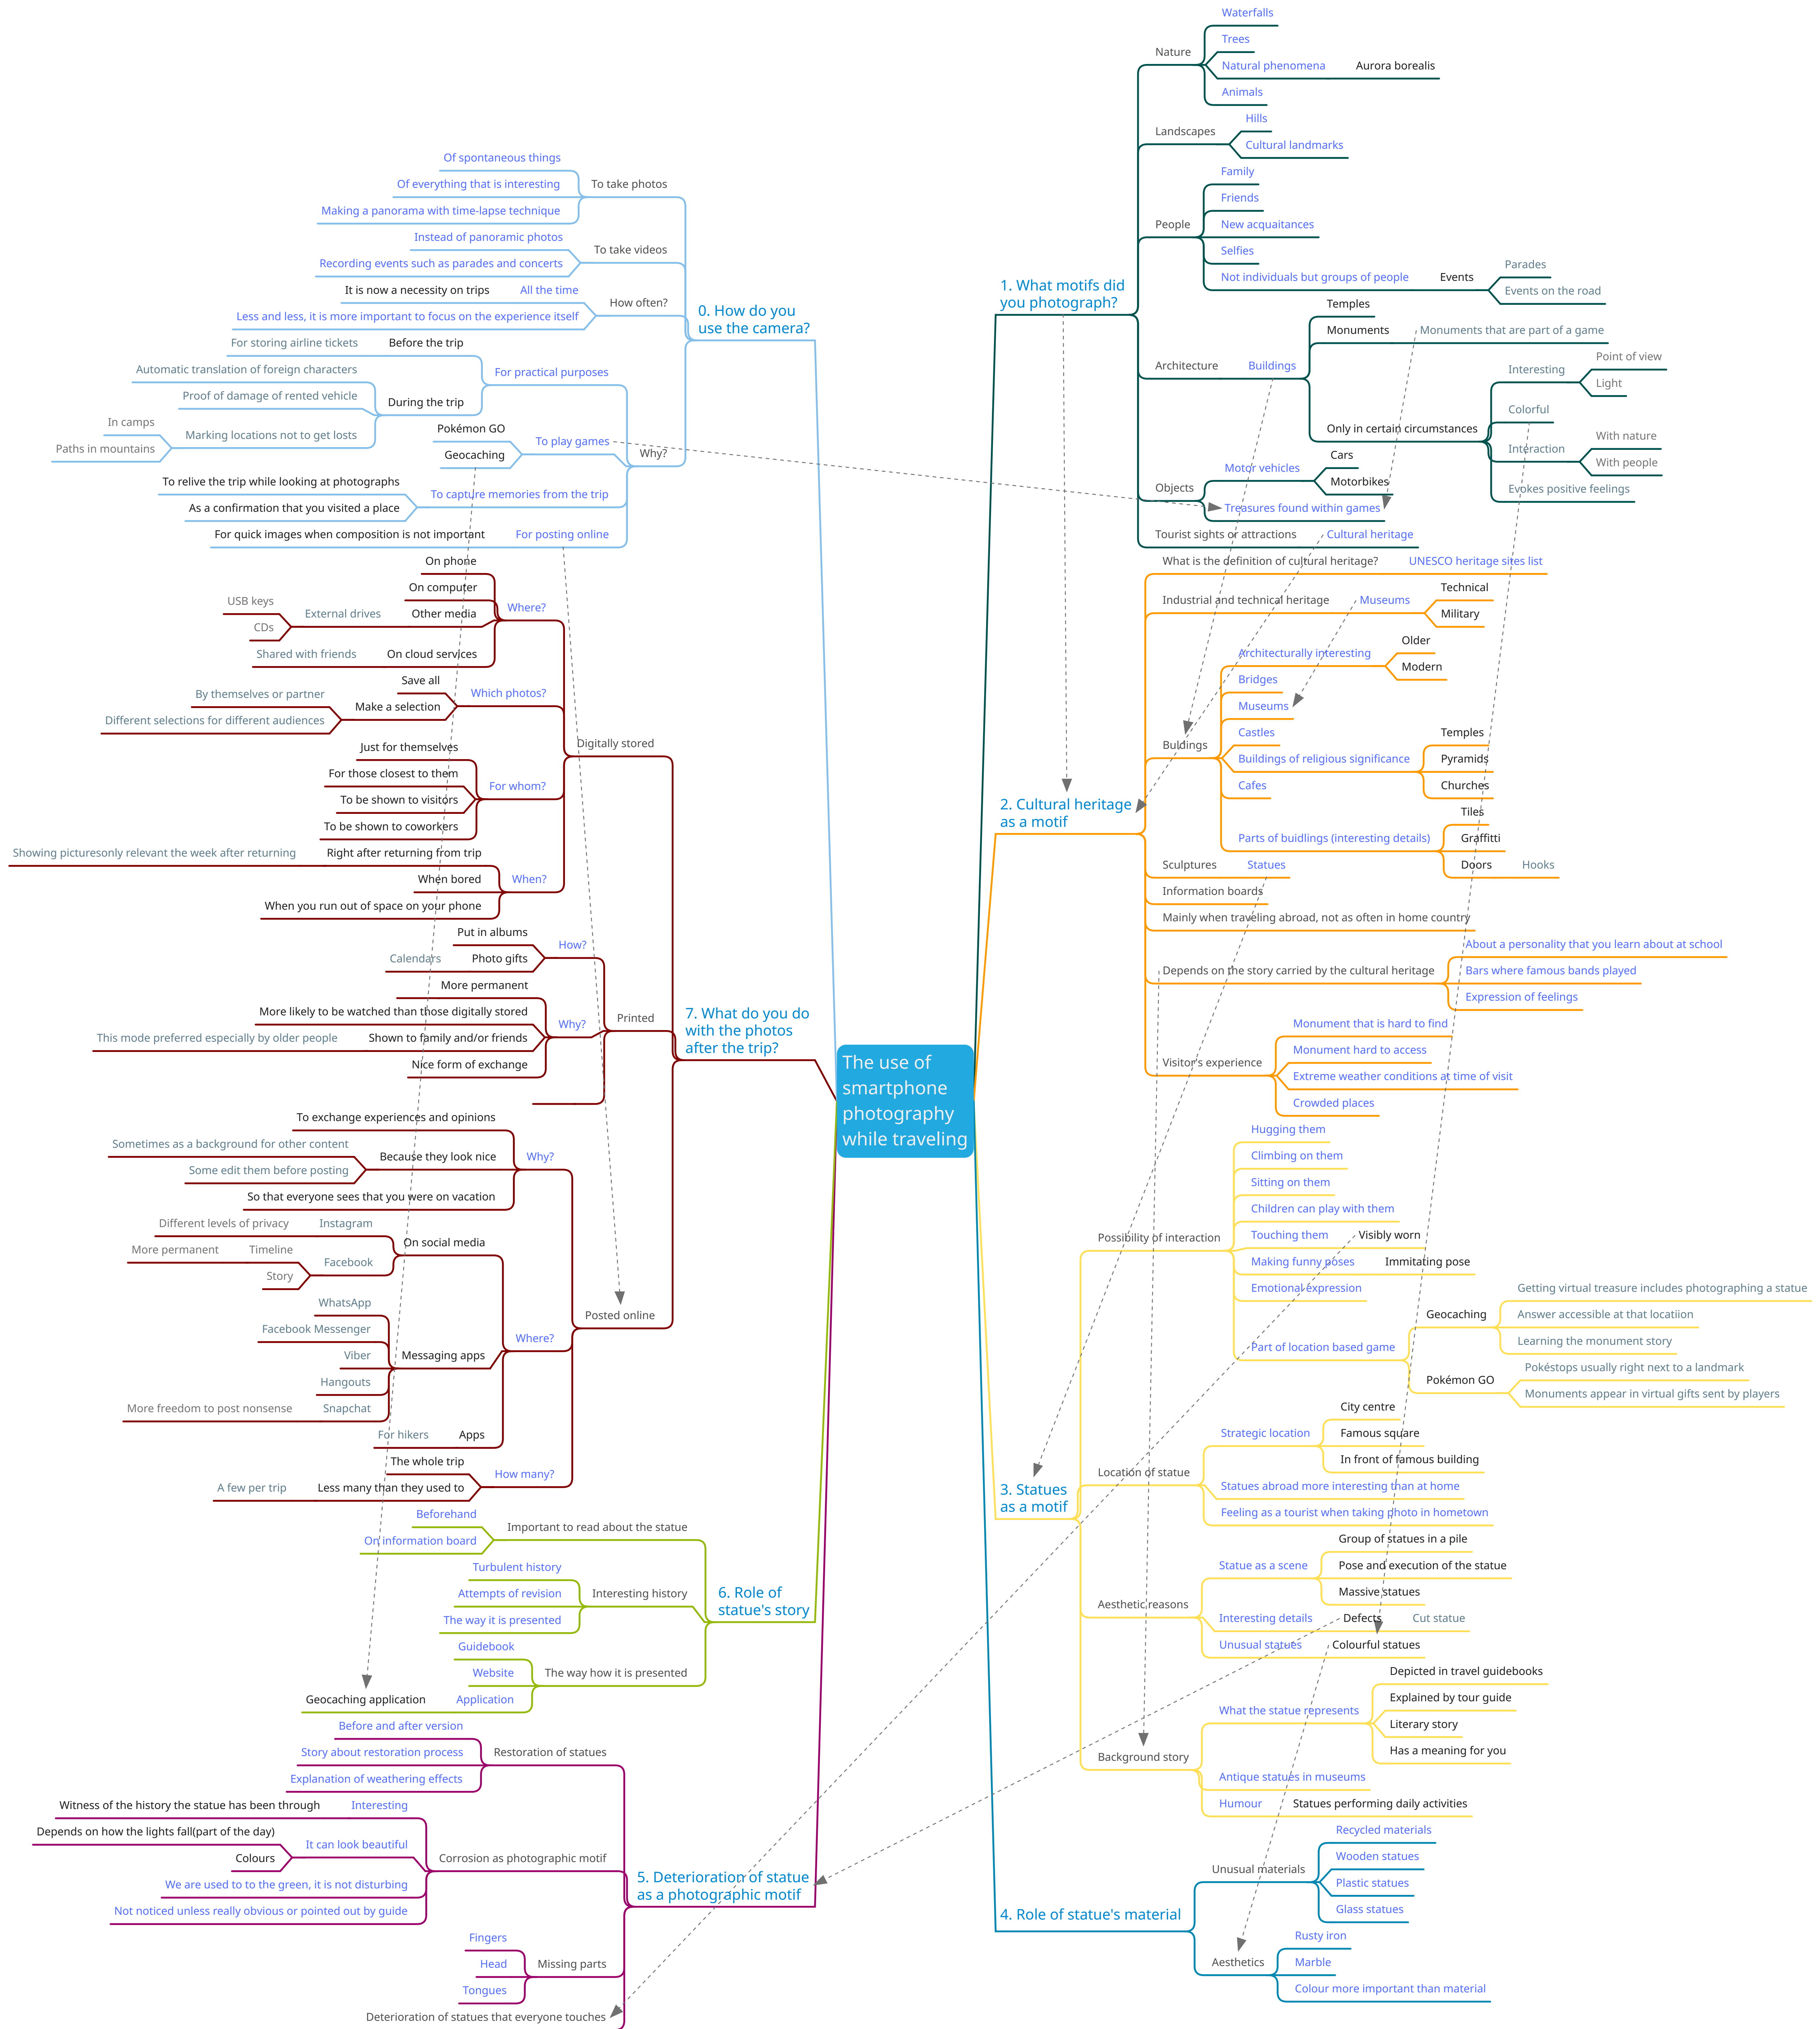

Supplement: s1 [file s1]

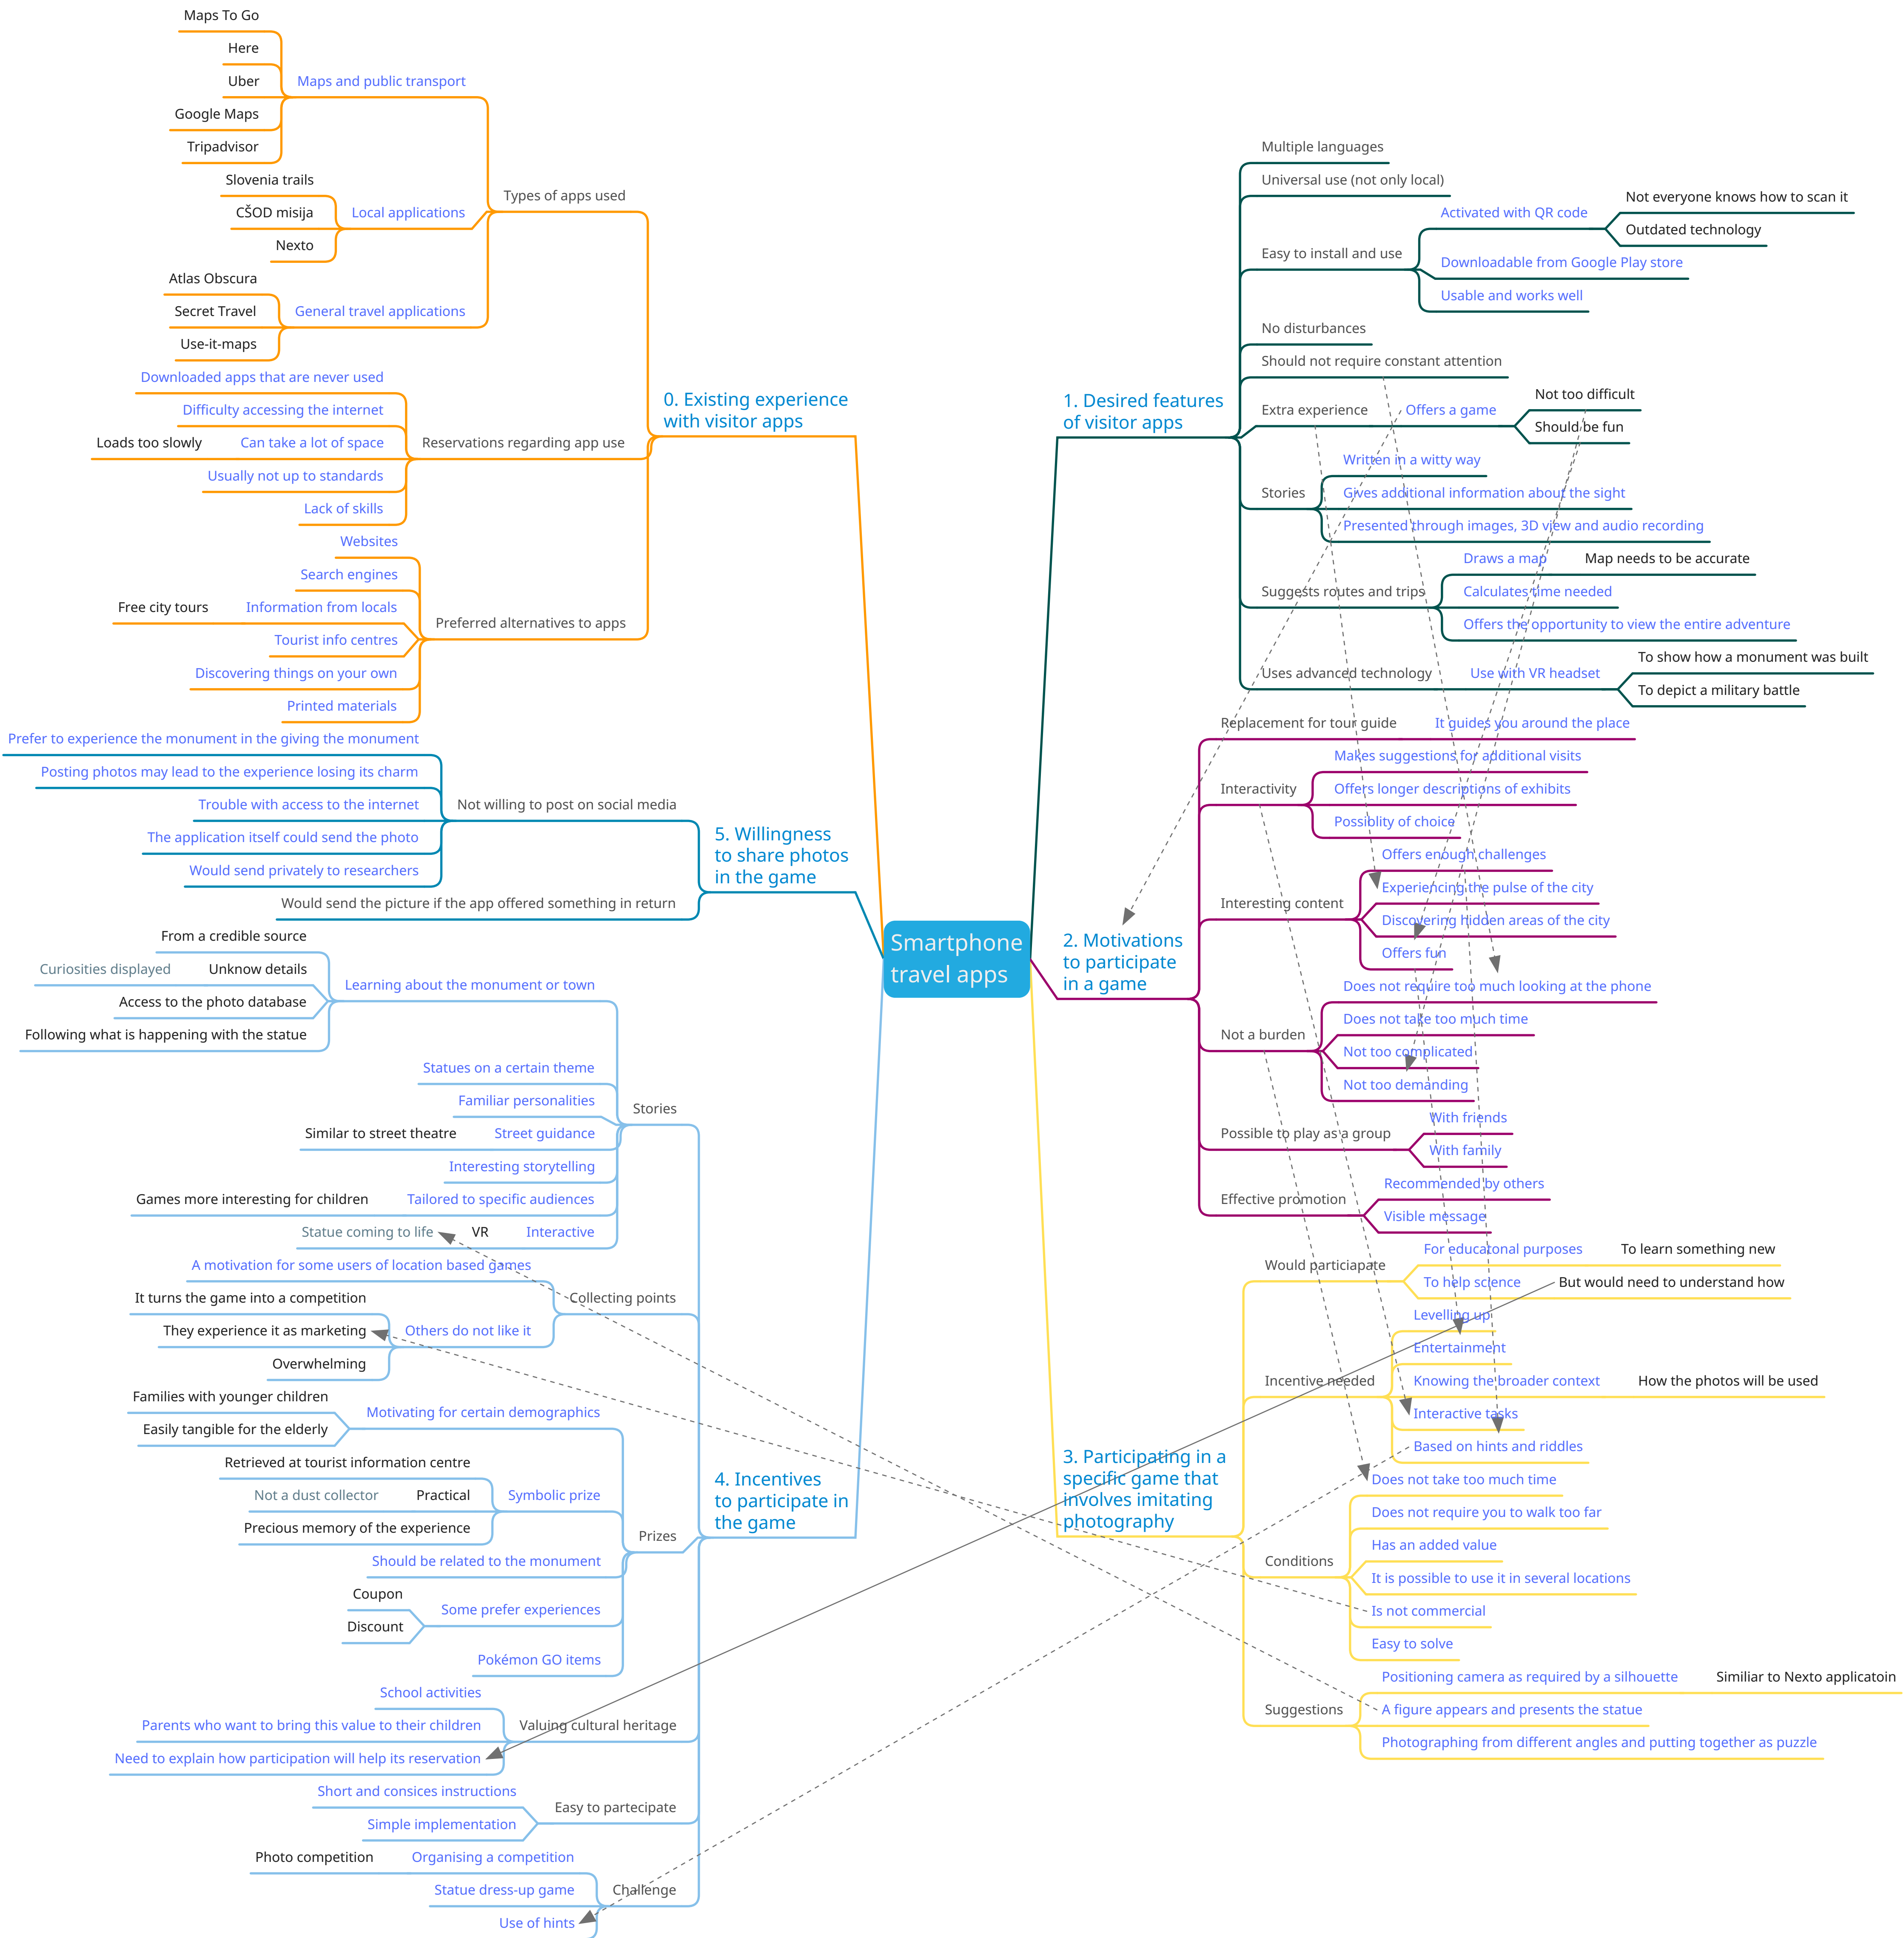

Supplement: s1 [file s1]
